# Supplementary material for: Critical role for isoprenoids in apicoplast biogenesis by malaria parasites
Source: eLife journal article supplement (doi:10.7554/elife.73208), 2022-03-08
Supplement: fig5-data1 [file elife-73208-fig5-data1-v2.pdf]

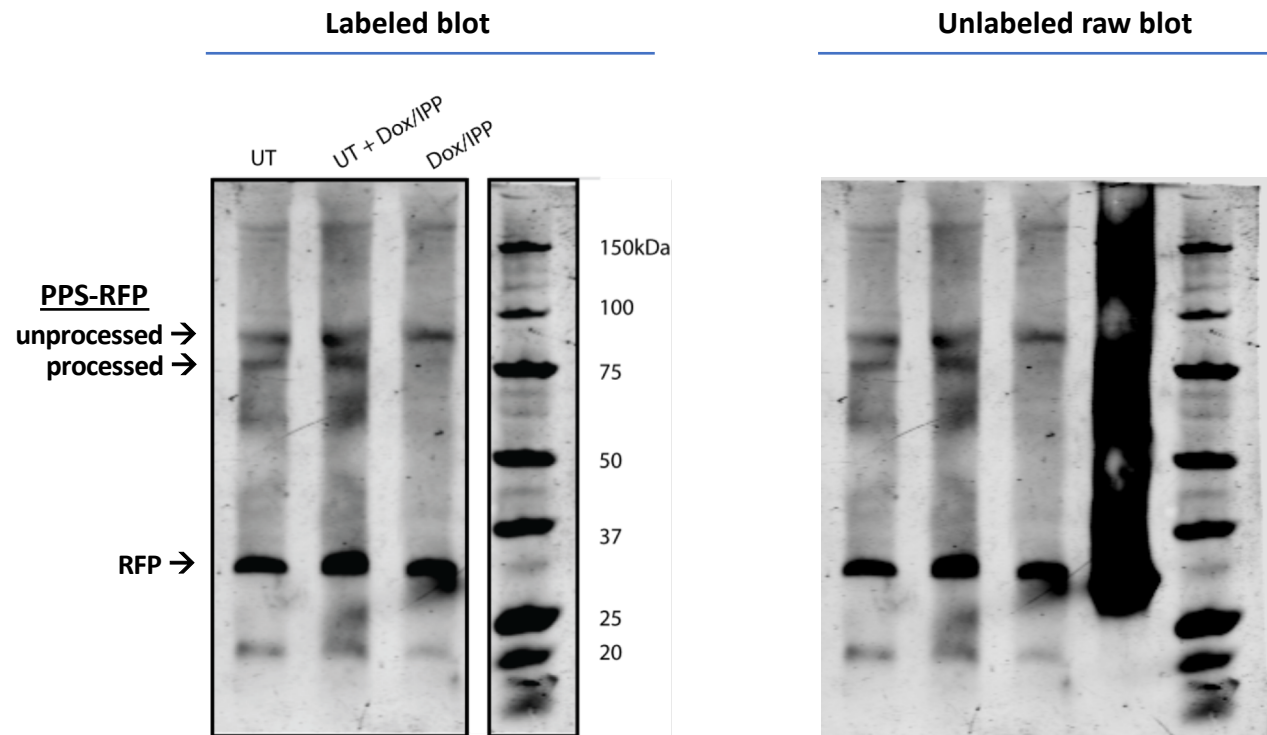

**Figure 5- source data 1.** Uncropped western blot image detecting PPS-RFP expression in Dd2 parasites. UT = untreated, Dox/IPP = parasites treated with 2  $\mu$ M doxycycline and 200  $\mu$ M IPP. The blot was probed with a mouse anti-RFP 1° antibody and donkey anti-mouse-DyLight800 2° antibody.
