# Supplementary material for: Critical role for isoprenoids in apicoplast biogenesis by malaria parasites
Source: eLife journal article supplement (doi:10.7554/elife.73208), 2022-03-08
Supplement: fig6-data2 [file elife-73208-fig6-data2-v2.pdf]

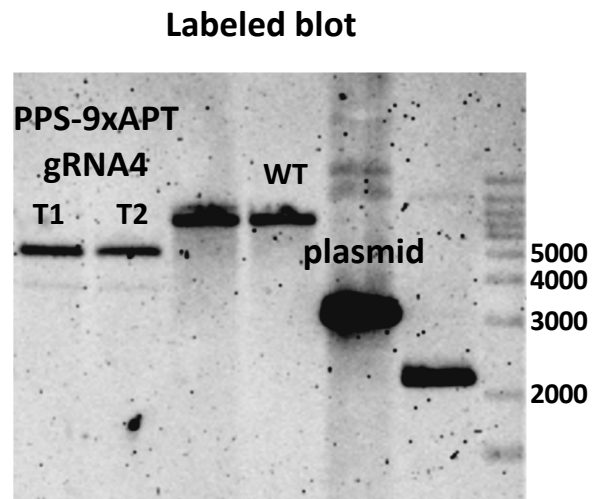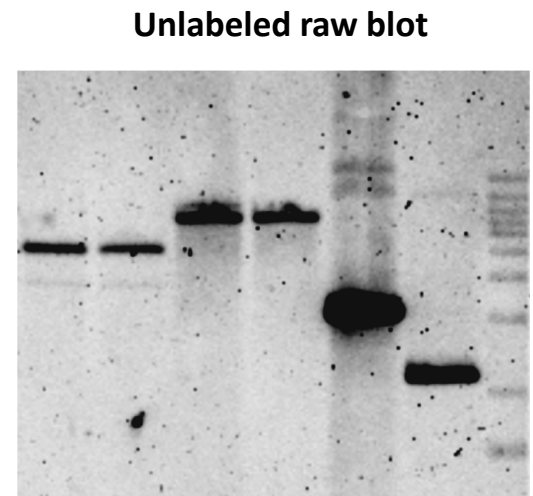

**Figure 6- source data 2.** Uncropped Southern blot image to probe integration of aptamer/TetR-DOZI cassette into PPS locus.
