# Supplementary material for: Critical role for isoprenoids in apicoplast biogenesis by malaria parasites
Source: eLife. 2022 Mar 8;11:e73208. doi: 10.7554/eLife.73208 (PMC8959605; doi:10.7554/eLife.73208)
Supplement: Figure 1—source data 1. [file elife-73208-fig1-data1.xlsx]

## Sheet: Figure 1C
Figure 1C
	normal	punctate	disrupted	total
UT-1	24	0	1	25
	0.96	0	0.04
UT-2	25	0	0	25
	1	0	0
FOS-1	2	21	2	25
	0.08	0.84	0.08
FOS-2	4	20	1	25
	0.16	0.8	0.04
FOS+MEV-1	22	1	2	25
	0.88	0.04	0.08
FOS+MEV-2	24	0	1	25
	0.96	0	0.04
ATV-1	24	0	1	25
	0.96	0	0.04
ATV-2	23	1	1	25
	0.92	0.04	0.04
DSM1-1	21	1	3	25
	0.84	0.04	0.12
DSM1-2	22	1	2	25
	0.88	0.04	0.08
BlastS-1	22	1	2	25
	0.88	0.04	0.08
BlastS-2	23	1	1	25
	0.92	0.04	0.04
WR-1	24	1	0	25
	0.96	0.04	0
WR-2	23	1	1	25
	0.92	0.04	0.04

## Sheet: Figure 1E
Figure 1E DXS-KO
	normal	punctate	disrupted	total
no mev-1	6	18	1	25
	0.24	0.72	0.04
no mev-2	4	19	2	25
	0.16	0.76	0.08
with mev-1	22	0	3	25
	0.88	0	0.12
with mev-2	24	0	1	25
	0.96	0	0.04

## Sheet: Figure 1 Supplement 2C
Figure 1 Supplement 2C
	normal	punctate	disrupted	total
UT-1	23	1	1	25
	0.92	0.04	0.04
UT-2	24	0	1	25
	0.96	0	0.04
FOS-1	3	21	1	25
	0.12	0.84	0.04
FOS-2	2	22	1	25
	0.08	0.88	0.04
FOS+IPP-1	25	0	0	25
	1	0	0
FOS+IPP-2	24	0	1	25
	0.96	0	0.04
ATV-1	24	1	0	25
	0.96	0.04	0
ATV-2	23	2	0	25
	0.92	0.08	0
DSM1-1	22	2	1	25
	0.88	0.08	0.04
DSM1-2	24	1	0	25
	0.96	0.04	0
BlastS-1	24	1	0	25
	0.96	0.04	0
BlastS-2	25	0	0	25
	1	0	0

## Sheet: Figure 4B
Figure 4B
	normal	punctate	disrupted	total
UT-1*	24	0	1	25	*same values as Figure 1
	0.96	0	0.04
UT-2*	25	0	0	25
	1	0	0
FOS-1*	2	21	2	25
	0.08	0.84	0.08
FOS-2*	4	20	1	25
	0.16	0.8	0.04
FOS+Bcar-1	1	24	0	25
	0.04	0.96	0
FOS+Bcar-2	3	21	1	25
	0.12	0.84	0.04
FOS+MEV-1	22	1	2	25
	0.88	0.04	0.08
FOS+MEV-2	24	0	1	25
	0.96	0	0.04
FOS+FOH-1	18	2	5	25
	0.72	0.08	0.2
FOS+FOH-2	20	4	1	25
	0.8	0.16	0.04
FOS+GGOH-1	21	1	3	25
	0.84	0.04	0.12
FOS+GGOH-2	22	1	2	25
	0.88	0.04	0.08
FOS+C50-1	21	1	3	25
	0.84	0.04	0.12
FOS+C50-2	21	2	2	25
	0.84	0.08	0.08

## Sheet: Figure 4 Supplement 3
Figure 4 Supplement 3
	normal	punctate	disrupted	total
UT-1*	23	1	1	25	*same values as Figure 1
	0.92	0.04	0.04
UT-2*	24	0	1	25
	0.96	0	0.04
FOS-1*	3	21	1	25
	0.12	0.84	0.04
FOS-2*	2	22	1	25
	0.08	0.88	0.04
FOS+Bcar-1	4	21	0	25
	0.16	0.84	0
FOS+Bcar-2	2	21	2	25
	0.08	0.84	0.08
FOS+IPP-1	25	0	0	25
	1	0	0
FOS+IPP-2	24	0	1	25
	0.96	0	0.04
FOS+FOH-1	24	1	0	25
	0.96	0.04	0
FOS+FOH-2	22	3	0	25
	0.88	0.12	0
FOS+GGOH-1	23	1	1	25
	0.92	0.04	0.04
FOS+GGOH-2	24	1	0	25
	0.96	0.04	0
FOS+C50-1	22	1	2	25
	0.88	0.04	0.08
FOS+C50-2	24	1	0	25
	0.96	0.04	0

## Sheet: Figure 5 Supplement 2
NF54
	normal	punctate	disrupted	total
UT-1*	24	0	1	25
	0.96	0	0.04
UT-2*	25	0	0	25
	1	0	0
FOS-1*	2	21	2	25
	0.08	0.84	0.08
FOS-2*	4	20	1	25
	0.16	0.8	0.04
MMV-1	24	1	0	25
	0.96	0.04	0
MMV-2	23	0	2	25
	0.92	0	0.08
D10
	normal	punctate	disrupted	total
UT-1*	23	1	1	25
	0.92	0.04	0.04
UT-2*	24	0	1	25
	0.96	0	0.04
FOS-1*	3	21	1	25
	0.12	0.84	0.04
FOS-2*	2	22	1	25
	0.08	0.88	0.04
MMV-1	23	1	1	25
	0.92	0.04	0.04
MMV-2	22	2	1	25
	0.88	0.08	0.04

## Sheet: Figure 7C
Figure 7E
with aTc
	Elongated	punctate	disrupted	total
UT-1	22	1	2	25
	0.88	0.04	0.08
UT-2	23	0	2	25
	0.92	0	0.08
FOS+IPP-1	25	0	0	25
	1	0	0
FOS+IPP-2	22	3	0	25
	0.88	0.12	0
FOS+FOH-1	22	2	2	25
	0.88	0.08	0.08
FOS+FOH-2	20	5	0	25
	0.8	0.2	0
FOS+GGOH-1	22	0	3	25
	0.88	0	0.12
FOS+GGOH-2	21	3	1	25
	0.84	0.12	0.04
FOS+C50-1	23	0	2	25
	0.92	0	0.08
FOS+C50-2	20	4	1	25
	0.8	0.16	0.04
No aTc
	Elongated	punctate	disrupted	total
UT-1	22	2	1	25
	0.88	0.08	0.04
UT-2	22	1	2	25
	0.88	0.04	0.08
FOS+IPP-1	5	17	3	25
	0.2	0.68	0.12
FOS+IPP-2	5	19	1	25
	0.2	0.76	0.04
FOS+FOH-1	0	22	3	25
	0	0.88	0.12
FOS+FOH-2	0	25	0	25
	0	1	0
FOS+GGOH-1	7	17	1	25
	0.28	0.68	0.04
FOS+GGOH-2	6	19	0	25
	0.24	0.76	0
FOS+C50-1	20	0	5	25
	0.8	0	0.2
FOS+C50-2	22	2	1	25
	0.88	0.08	0.04

## Sheet: Figure 7E
Figure 7E
	Elongated	punctate	disrupted	total
with aTc
IPP-1	21	2	2	25
	0.84	0.08	0.08
IPP-2	22	1	2	25
	0.88	0.04	0.08
no aTc
IPP-1	7	1	17	25
	0.28	0.04	0.68
IPP-2	8	1	16	25
	0.32	0.04	0.64

## Sheet: Figure 7 Supplement 1
Figure 7 Supplement 1
	Elongated	disrupted	total
with aTc
	39	3	42
	0.928571	0.0714286	1
no aTc + IPP
	49	19	68
	0.720588	0.279412	1
