# Supplementary material for: Critical role for isoprenoids in apicoplast biogenesis by malaria parasites
Source: eLife journal article supplement (doi:10.7554/elife.73208), 2022-03-08
Supplement: supp [file elife_poa_e73208_Figure_5_figure_supplement_1.docx]

TR|O96130|O96130_PLAF7 MVHLSKRNNIKSFLNYCKAKYLNPLLINKNEDIIKETSILKNNNLYSRKESNVFIEILKS 60

SP|P08836|FPPS_CHICK ------------------------------------------------------------

TR|Q8II79|Q8II79_PLAF7 ------------------------------------------------------------

TR|O96130|O96130_PLAF7 SFIKFRGQKINEEINNHNNIINNSSHNNNHNIYHDTNKKKKQQYEEKHNVFHTENMHKEV 120

SP|P08836|FPPS_CHICK -MHKFTGVN---------------------------------------AKFQ-----QPA 15

TR|Q8II79|Q8II79_PLAF7 ------------------------------------------------------------

TR|O96130|O96130_PLAF7 LLCMDVLQYEEDKVNRELHLLHSYFNKE--------RTNIDPYTLCESKIKNIDEYIYNI 172

SP|P08836|FPPS_CHICK LRNL-----SPVVVEREREEFVGFFPQIVR---DLTEDGIGHPEVGD------------- 54

TR|Q8II79|Q8II79_PLAF7 ---M-----ENEQNNQDSENGLDYFRSMYDRYRDVFINHINDYVLEDD--------IKII 44

: . ::: . .:* . *. : :

TR|O96130|O96130_PLAF7 IKTNYKNIDEFITYIYLYKGKRFRVILSILLKNILHHIDNVSKIKTNFKNRNIQRKFFKS 232

SP|P08836|FPPS_CHICK AVARLKEV---LQYN-APGGKCNRGLTVVAA----------------------------- 81

TR|Q8II79|Q8II79_PLAF7 ISKYYKLL---FDYN-CLGGKNNRGILVILI----------------------------- 71

* : : * ** * : :

TR|O96130|O96130_PLAF7 NKLTSNYLSNKLKLYNLKITQKKNICEKTVLDNQCKIIAASEIIHM**GS**LLHDDVIDDSNK 292

SP|P08836|FPPS_CHICK --------------YRE--LSGPGQKDAESLRCALAVGWCIELFQA**FF**LVADDIMDQSLT 125

TR|Q8II79|Q8II79_PLAF7 --------------YEY--VKNRDI-NCNEWEKVACIAWCIEILQA**SF**LVADDIMDKGET 114

*. . . : : . *::: *: **::*.. .

TR|O96130|O96130_PLAF7 RRGVIALHKKFGNKISILSGD-YLLARASSIFAGTGSPKICRSFSYVVE----------S 341

SP|P08836|FPPS_CHICK RRGQLCWYKKEGVGL-DAINDSFLLESS--VYRV--LKKYCRQRPYYVHLLELFLQTAYQ 180

TR|Q8II79|Q8II79_PLAF7 RRNKHCWYLLKDVEIKNAVNDVFLLYNA--IYKL--LDVYLRNDNCYLDLITSFREATLK 170

**. . : . : .* :** : :: *. :. .

TR|O96130|O96130_PLAF7 LIKGEFLQRNLK------------FNNV------EEALKMYLIKSY-----HKTA--SLF 376

SP|P08836|FPPS_CHICK TELGQMLDLITA-------------------PVSKVDLSHFSEERYKAIVKYKTAFYSFY 221

TR|Q8II79|Q8II79_PLAF7 TIVGQHLDTNIFSDKYSHIDKDIDVNNINISQENKININMLNFKVYQNIIIHKTAYYSFF 230

*: *: : :. : * :*** *::

TR|O96130|O96130_PLAF7 SHLFACIAILSFKND-TIIQLCFNLGLHIGMAFQLYDDYLDYKIDDNTNKPILNDLKNNI 435

SP|P08836|FPPS_CHICK LPVAAAMYMVGIDSKEE-HENAKAILLEMGEYFQIQDDYLDCFGDPALTGKVGTDIQDNK 280

TR|Q8II79|Q8II79_PLAF7 LPIVCGMQMGGISLDNLLYKKVENIAILMGEYFQVHDDYIDTFGDSKKTGKVGSDIQNNK 290

: . : : .:. . : : : :* **: ***:* * . : .*:::*

TR|O96130|O96130_PLAF7 KTAPLLFSYNYNPQVILQLINKNSYTNNDIENILYY---------------IQHSNSMKK 480

SP|P08836|FPPS_CHICK CSWLVVQCLQRVTPEQRQLLEDN-YGRKEPEKVAKVKELYEAVGMRAAFQQYEESSYRRL 339

TR|Q8II79|Q8II79_PLAF7 LTWPLIKAFELCSQPEKEDIIRN-YGKDNVTCIKFINDIYEHYNIRDHYVEYEKKQKMKI 349

: :: . : : : * * ..: : :... :

TR|O96130|O96130_PLAF7 NELCSLLHIKKASDILYSLISHCNKPSTNKNNTKHDDIKQSSEALINLILNVLSRNVK-- 538

SP|P08836|FPPS_CHICK QELIEKHSNR----------------------------------LPKEIFLGLAQKIYKR 365

TR|Q8II79|Q8II79_PLAF7 LEAINQLHHE--------------------------GIEYVLKYVMDILFTGA------- 376

* . . : . ::

TR|O96130|O96130_PLAF7 --

SP|P08836|FPPS_CHICK QK 367

TR|Q8II79|Q8II79_PLAF7 --
