# Supplementary material for: Critical role for isoprenoids in apicoplast biogenesis by malaria parasites
Source: eLife journal article supplement (doi:10.7554/elife.73208), 2022-03-08
Supplement: supp [file Figure 3- source data 1.pdf › Source Data/Figure 3- source data 1.pdf]

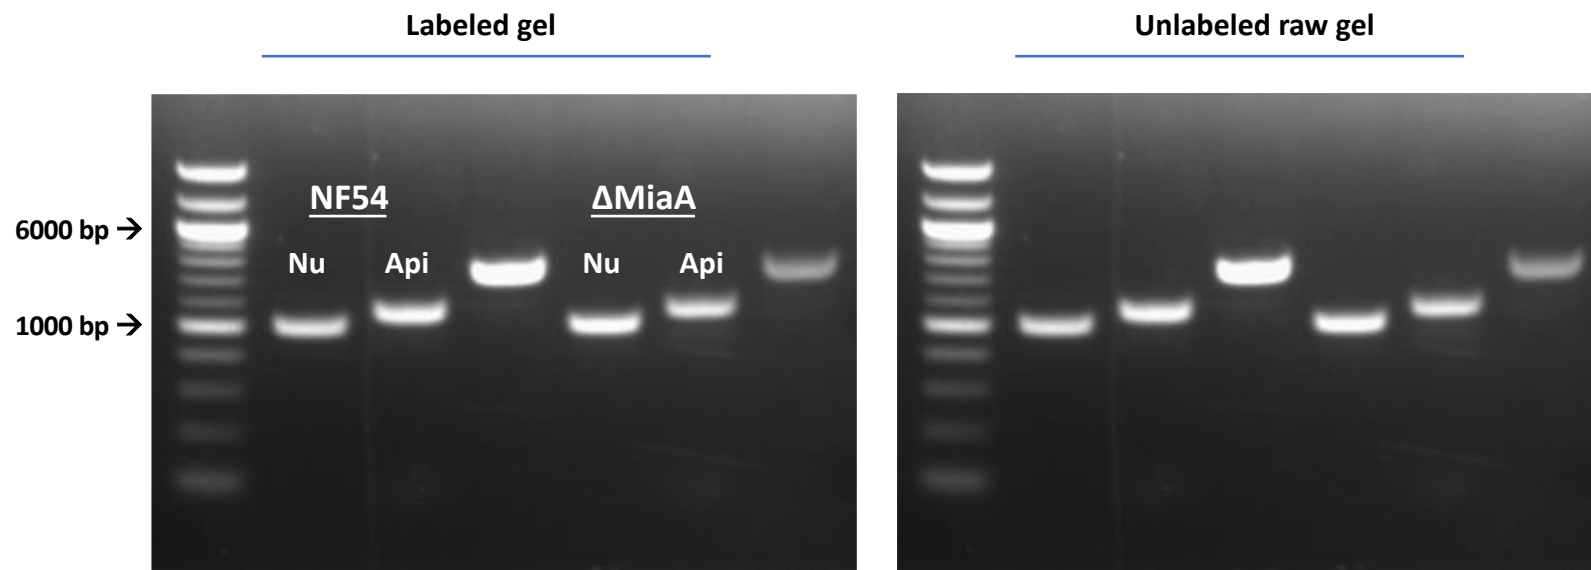

**Figure 3- source data 1.** Uncropped gel image of PCR analysis showing amplification of a (Nu) nuclear (PPS, PF3D7\_0202700) and (Api) apicoplast (SufB, PF3D7\_API04700) gene.
