# Supplementary material for: Critical role for isoprenoids in apicoplast biogenesis by malaria parasites
Source: eLife journal article supplement (doi:10.7554/elife.73208), 2022-03-08
Supplement: supp [file Figure 3- source data 2.pdf › Source Data/Figure 3- source data 2.pdf]

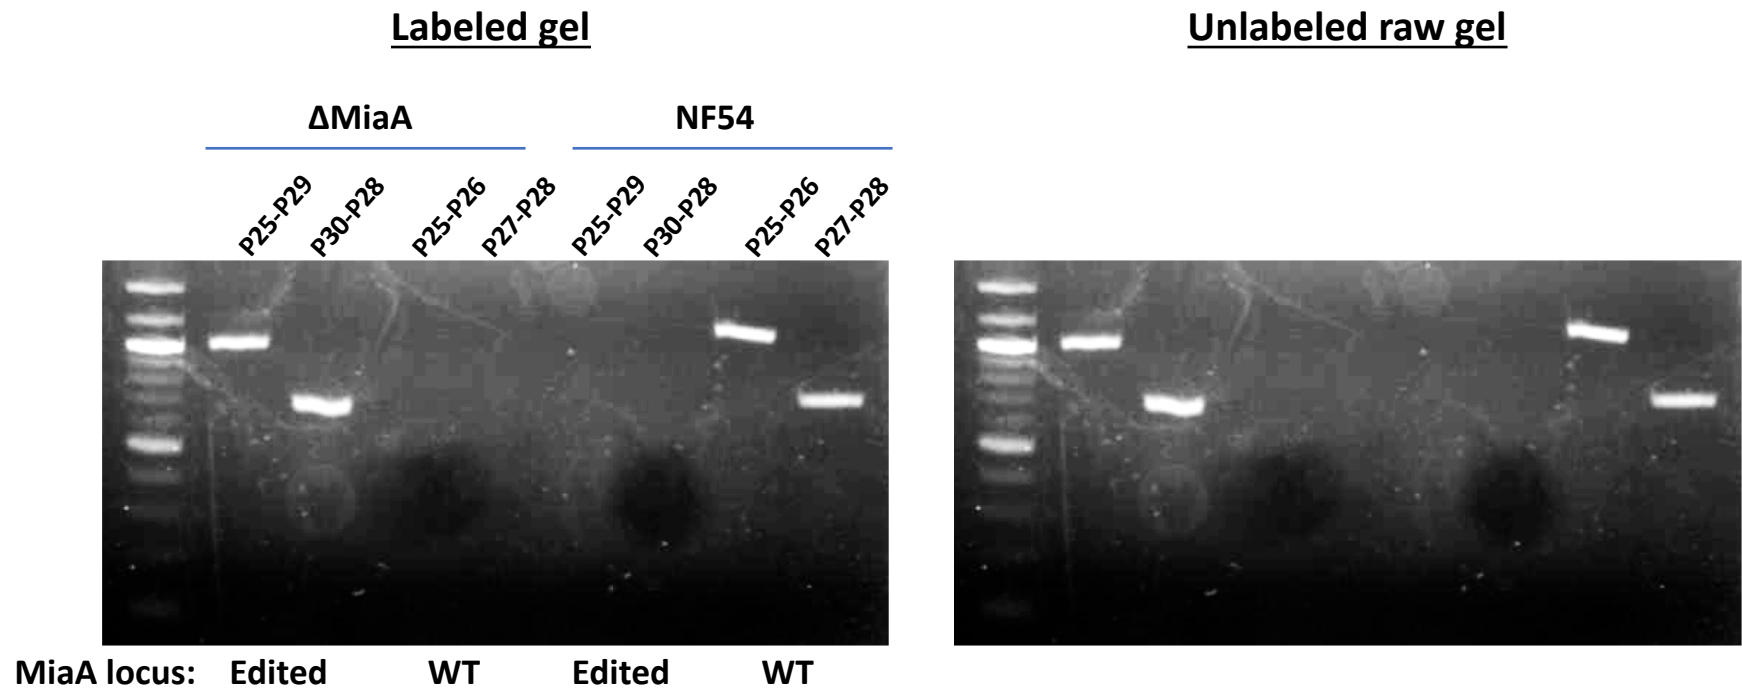

**Figure 3- source data 2.** Uncropped gel image of genomic PCR analysis of parental NF54 PfMev parasites and polyclonal transfected parasite progeny confirming successful disruption of MiaA.
