# Supplementary material for: Critical role for isoprenoids in apicoplast biogenesis by malaria parasites
Source: eLife journal article supplement (doi:10.7554/elife.73208), 2022-03-08
Supplement: supp [file Figure 6 - source data 1.pdf › Source Data/Figure 6 - source data 1.pdf]

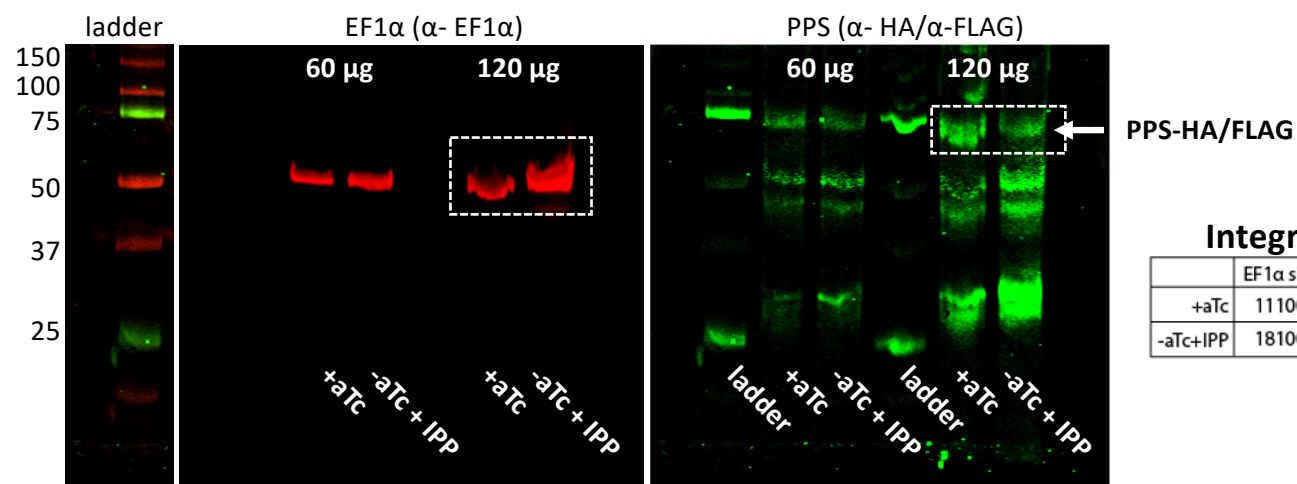

### Integrated band intensities by densitometry

|          | EF1α signal | Normalization factor | PPS signal | Normalized PPS signal | +aTc / -aTc+IPP |
|----------|-------------|----------------------|------------|-----------------------|-----------------|
| +aTc     | 1110000     | 0.61                 | 322        | 528                   | 2.8             |
| -aTc+IPP | 1810000     | 1.00                 | 187        | 187                   |                 |

Raw gel images

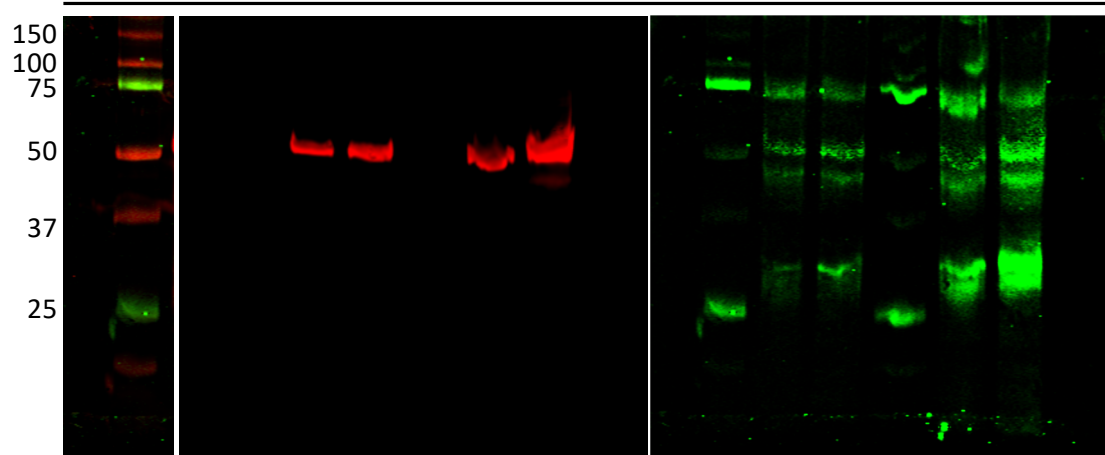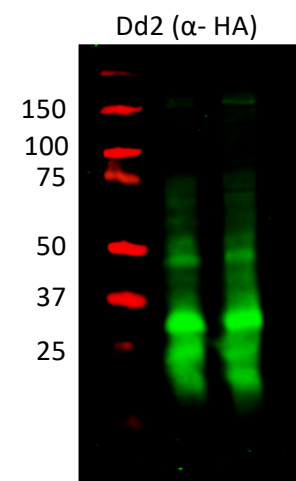

**Figure 6- source data 1.** Uncropped western blot images of Dd2 parasites with endogenously tagged PPS-HA/FLAG and probed with anti-HA and anti-FLAG antibodies and anti-EF1alpha antibody. The band for PPS was not detected in untagged parental Dd2 parasites.
